# Supplementary material for: Improved tunable range of the field-induced storage modulus by using flower-like particles as the active phase of magnetorheological elastomers
Source: Royal Society of Chemistry journal article supplement (doi:10.1039/c8sm00359a), 2018-01-01
Supplement: c8sm00359a1.pdf [file c8sm00359a1.pdf]

Supporting Information

# Improved Field-induced Storage Modulus Tunable Range by using Flower-like Particles as the Active Phase of Magnetorheological Elastomers

*Yu Tong, Xufeng Dong\*, Min Qi\*\**

School of Materials Science and Engineering, Dalian University of Technology, Dalian  
116024, People's Republic of China

\*Author to whom correspondence should be addressed. E-mail: [dongxf@dlut.edu.cn](mailto:dongxf@dlut.edu.cn)(X.  
D.) or [minqi@dlut.edu.cn](mailto:minqi@dlut.edu.cn) (M.Q.).

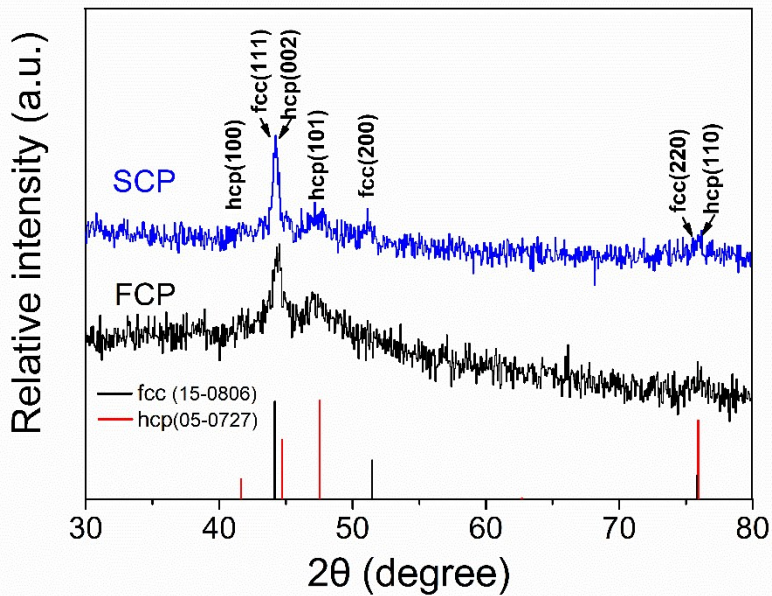

**Figure S1.** XRD pattern of sphere cobalt particles and flower-like cobalt particles.

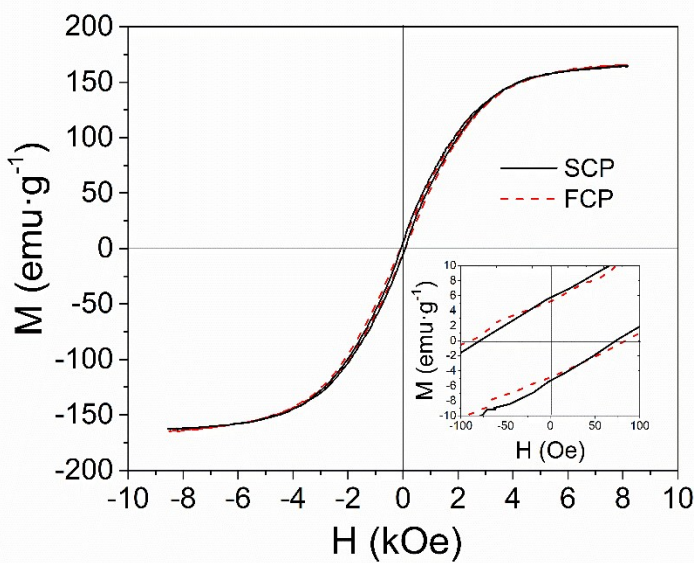

**Figure S2.** Magnetic hysteresis loops of sphere cobalt particles and flower-like cobalt particles.

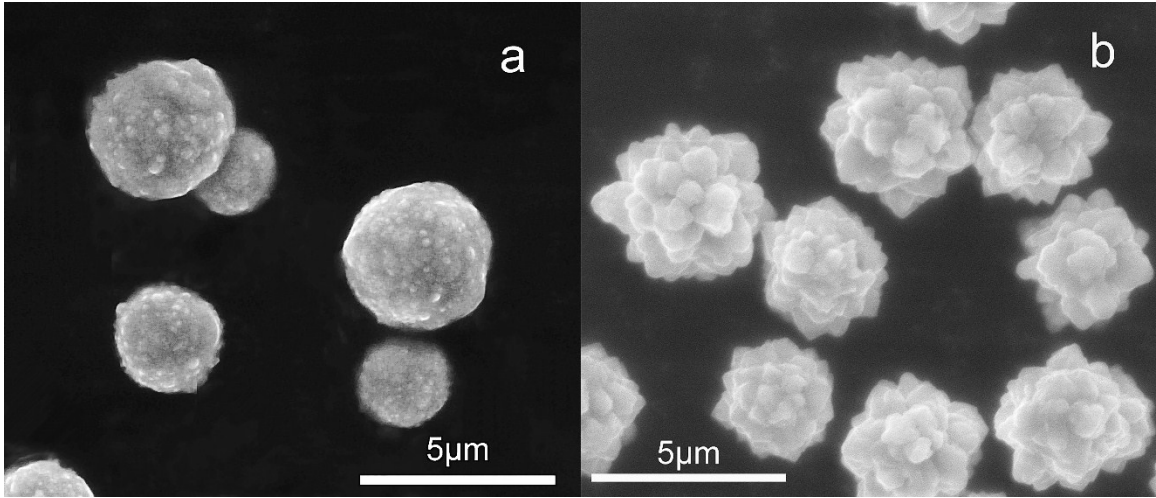

**Figure S3.** SEM image of (a) sphere cobalt particles and (b) flower-like cobalt particles.
